# Supplementary material for: Influence of the Lewis basicity hardness of crystallization solvents on the coordination sphere of the complex [Co(3,5-dinitrobenzoate-O,O′)2]: crystallographic and theoretical analysis
Source: Royal Society of Chemistry journal article supplement (doi:10.1039/d2ce00177b), 2022-01-01
Supplement: d2ce00177b1.pdf [file d2ce00177b1.pdf]

# Influence of the Lewis basicity hardness of recrystallization solvents on the coordination sphere of the complex [Co(3,5-dinitrobenzoate-O,O')<sub>2</sub>]: Crystallographic and Theoretical Analysis.

*Daniela Fonseca*<sup>†</sup>, *Andrés F. Pérez-Torres*<sup>‡</sup>, *Justo Cobo*<sup>‡</sup>, *Jhon Zapata-Rivera*<sup>‡</sup>, *John J. Hurtado*<sup>†\*</sup>, and *Mario A. Macías*<sup>‡\*</sup>.

<sup>†</sup> Inorganic Chemistry, Catalysis and Bio-inorganic Group, Department of Chemistry, Universidad de los Andes, Carrera 1 No. 18A-12, 111711 Bogotá, Colombia.

<sup>‡</sup> Crystallography and Chemistry of Materials, CrisQuimMat, Department of Chemistry, Universidad de los Andes, Carrera 1 No. 18A-10, 111711 Bogotá, Colombia.

<sup>‡</sup> Molecular Electronic Structure Group, Department of Chemistry, Universidad de los Andes, Carrera 1 No. 18A-10, 111711 Bogotá, Colombia.

<sup>‡</sup> Departamento de Química Inorgánica y Orgánica Campus las Lagunillas, Universidad de Jaén, E-23071 Jaén, Spain.

\*Corresponding Author(s): [jj.hurtado@uniandes.edu.co](mailto:jj.hurtado@uniandes.edu.co); [ma.maciasl@uniandes.edu.co](mailto:ma.maciasl@uniandes.edu.co)

## Table of contents

|                                                                                                                                                                                   |      |
|-----------------------------------------------------------------------------------------------------------------------------------------------------------------------------------|------|
| Table S1 Dielectric constants and dipole moments of solvents.....                                                                                                                 | pg 2 |
| Table S2. Crystallographic data of complex [Co(DNB) <sub>2</sub> ] recrystallized in acetone (Ac), acetonitrile (ACN), dimethyl sulfoxide (DMSO), and water H <sub>2</sub> O..... | pg 3 |
| Table S3. Suggested names considering the nomenclature.....                                                                                                                       | pg 4 |
| Figure S1. Graphical result of LeBail analysis of complex [Co(DNB) <sub>2</sub> ] .....                                                                                           | pg 5 |
| Figure S2. Packing of the complex [Co(DNB) <sub>2</sub> ] recrystallized in H <sub>2</sub> O .....                                                                                | pg 5 |
| Figure S3. Packing of the complex [Co(DNB) <sub>2</sub> ] recrystallized in MeOH.....                                                                                             | pg 6 |
| Figure S4. Packing of the complex [Co(DNB) <sub>2</sub> ] recrystallized in EtOH.....                                                                                             | pg 6 |

Figure S5. Optimized geometries of models of the [Co(DBN)<sub>2</sub>] complex recrystallized in the different solvents.....pg 7

Figure S6. SOMOs of models of the [Co(DBN)<sub>2</sub>] complex recrystallized in ACN. a) Mononuclear with S=3/2 ground state and b) Trinuclear with S=9/2 ground state. ....pg 7

Table S4. Analysis of Potential Hydrogen Bonds for complex crystallized in water.....pg 8

Table S5. Analysis of Potential Hydrogen Bonds for complex crystallized in MeOH .....pg 9

Table S6. Analysis of Potential Hydrogen Bonds for complex crystallized in EtOH .....pg 9

Table S7. Analysis of Potential Hydrogen Bonds for complex crystallized in DMSO .....pg 10

Table S8. Analysis of Potential Hydrogen Bonds for complex crystallized in Acetone .....pg 11

Table S9. Analysis of Potential Hydrogen Bonds for complex crystallized in Acetone .....pg 12

Table S1. Dielectric constants and dipole moments for water (H<sub>2</sub>O), methanol (CH<sub>3</sub>OH), ethanol (EtOH), dimethyl sulfoxide (DMSO), acetone (Act), and acetonitrile (ACN).

|                         | <b>Dielectric constant*</b> | <b>Dipole moment (D)*</b> |
|-------------------------|-----------------------------|---------------------------|
| <b>H<sub>2</sub>O</b>   | 80                          | 1.85                      |
| <b>DMSO</b>             | 47                          | 3.96                      |
| <b>ACN</b>              | 37                          | 3.92                      |
| <b>CH<sub>3</sub>OH</b> | 33                          | 1.70                      |
| <b>EtOH</b>             | 30                          | 1.69                      |
| <b>Act</b>              | 21                          | 2.88                      |

\* Li, C.-P.; Du, M. Role of solvents in coordination supramolecular systems. *Chem. Commun.* 2011, 47, 5958–5972. DOI: 10.1039/c1cc10935a

Table S2. Crystallographic data of complex [Co(DNB)<sub>2</sub>] crystallized in acetone (Act), acetonitrile (ACN), dimethyl sulfoxide (DMSO), and water H<sub>2</sub>O.

| Crystal Data                                                    | Act                                                                             | ACN                                                                             | DMSO                                                                            | H <sub>2</sub> O                                                 |
|-----------------------------------------------------------------|---------------------------------------------------------------------------------|---------------------------------------------------------------------------------|---------------------------------------------------------------------------------|------------------------------------------------------------------|
| Chemical Formula                                                | C <sub>66</sub> H <sub>74</sub> Co <sub>3</sub> N <sub>12</sub> O <sub>48</sub> | C <sub>54</sub> H <sub>38</sub> Co <sub>3</sub> N <sub>18</sub> O <sub>37</sub> | C <sub>18</sub> H <sub>22</sub> CoN <sub>4</sub> O <sub>16</sub> S <sub>2</sub> | C <sub>14</sub> H <sub>22</sub> CoN <sub>4</sub> O <sub>20</sub> |
| M <sub>r</sub>                                                  | 1980.16                                                                         | 1707.81                                                                         | 673.44                                                                          | 625.28                                                           |
| Solvent for Crystallization                                     | <i>Acetone</i>                                                                  | <i>Acetonitrile</i>                                                             | <i>dimethylsulfoxide</i>                                                        | <i>water</i>                                                     |
| Crystalline system, space group                                 | Triclinic, <i>P</i> -1                                                          | Triclinic, <i>P</i> -1                                                          | Monoclinic, <i>P</i> 2 <sub>1</sub> / <i>n</i>                                  | Triclinic, <i>P</i> -1                                           |
| <i>a</i> , <i>b</i> , <i>c</i> (Å)                              | 12.7882 (10), 13.2551 (10), 14.4372 (11)                                        | 11.2634 (8), 12.6777 (9), 25.2927 (18)                                          | 10.3871 (9), 5.2909 (4), 22.6353 (17)                                           | 7.1199 (3), 11.6544 (5), 15.0334 (7)                             |
| <i>α</i> , <i>β</i> , <i>γ</i> (°)                              | 67.940 (2), 79.147 (3), 69.028 (3)                                              | 99.217 (3), 102.517 (3), 100.460 (3)                                            | 90, 91.788 (3)                                                                  | 103.409 (2), 98.950 (2), 92.642 (2)                              |
| Volume, (Å <sup>3</sup> )                                       | 2113.7 (3)                                                                      | 3391.5 (4)                                                                      | 1243.36 (17)                                                                    | 1194.27 (9)                                                      |
| Z                                                               | 1                                                                               | 2                                                                               | 2                                                                               | 2                                                                |
| Temperature, (K)                                                | 100(2)                                                                          | 100(2)                                                                          | 100(2)                                                                          | 100(2)                                                           |
| Radiation type                                                  | Mo K <sub>α</sub>                                                               | Mo K <sub>α</sub>                                                               | Mo K <sub>α</sub>                                                               | Mo K <sub>α</sub>                                                |
| μ (mm <sup>-1</sup> )                                           | 0.69                                                                            | 0.84                                                                            | 0.95                                                                            | 0.82                                                             |
| <b>Data collection</b>                                          |                                                                                 |                                                                                 |                                                                                 |                                                                  |
| Diffractometer                                                  | Bruker D8 Venture                                                               | Bruker D8 Venture                                                               | Bruker D8 Venture                                                               | Bruker D8 Venture                                                |
| Absorption correction                                           | Multi-Scan method (SADABS)                                                      | Multi-Scan method (SADABS)                                                      | Multi-Scan method (SADABS)                                                      | Multi-Scan method (SADABS)                                       |
| No. of measured, independent and observed reflections [I>2σ(I)] | 92160, 12892, 9316                                                              | 168659, 20677, 16206                                                            | 20489, 2845, 2536                                                               | 42405, 5469, 5113                                                |
| R <sub>int</sub>                                                | 0.060                                                                           | 0.049                                                                           | 0.048                                                                           | 0.037                                                            |
| (sin θ/λ) <sub>max</sub> (Å <sup>-1</sup> )                     | 0.717                                                                           | 0.715                                                                           | 0.650                                                                           | 0.650                                                            |
| <b>Refinement</b>                                               |                                                                                 |                                                                                 |                                                                                 |                                                                  |
| R[F <sup>2</sup> > 2σ(F <sup>2</sup> )], wR(F <sup>2</sup> ), S | 0.057, 0.164, 1.14                                                              | 0.036, 0.102, 1.16                                                              | 0.025, 0.066, 1.10                                                              | 0.022, 0.058, 1.06                                               |
| No. of reflections                                              | 12892                                                                           | 20677                                                                           | 2845                                                                            | 5469                                                             |
| Refined parameters                                              | 607                                                                             | 1026                                                                            | 189                                                                             | 352                                                              |
| H-atoms treatment                                               | H atoms treated by a mixture of independent and constrained refinement          | H atoms treated by a mixture of independent and constrained refinement          | H-atom parameters constrained                                                   | H-atom parameters constrained                                    |
| Δρ <sub>max</sub> , Δρ <sub>min</sub> (e Å <sup>-3</sup> )      | 1.77, -0.94                                                                     | 0.54, -0.63                                                                     | 0.37, -0.42                                                                     | 0.38, -0.35                                                      |

Table S3. Suggested names considering the nomenclature for compounds crystallized in water (H<sub>2</sub>O), methanol (CH<sub>3</sub>OH), ethanol: acetone (EtOH: Act), dimethyl sulfoxide (DMSO), acetone (Act), and acetonitrile (ACN)

|                         |                                                                                                                                                                                                                                                                                                                                                                                                                                                                                                                                                                                                                                  |
|-------------------------|----------------------------------------------------------------------------------------------------------------------------------------------------------------------------------------------------------------------------------------------------------------------------------------------------------------------------------------------------------------------------------------------------------------------------------------------------------------------------------------------------------------------------------------------------------------------------------------------------------------------------------|
| <b>H<sub>2</sub>O</b>   | Tetraaquabis(3,5-dinitrobenzoato-κ <sup>1</sup> O)cobalt(II) tetrahydrate.                                                                                                                                                                                                                                                                                                                                                                                                                                                                                                                                                       |
| <b>CH<sub>3</sub>OH</b> | Tetrakis(methanol)bis(3,5-dinitrobenzoato-κ <sup>1</sup> O)cobalt(II).                                                                                                                                                                                                                                                                                                                                                                                                                                                                                                                                                           |
| <b>EtOH: Act</b>        | Tetrakis(ethanol)bis(3,5-dinitrobenzoato-κ <sup>1</sup> O)cobalt(II).                                                                                                                                                                                                                                                                                                                                                                                                                                                                                                                                                            |
| <b>DMSO</b>             | Diaquabis(dimethylsulfoxide-κO)bis(3,5-dinitrobenzoato-κ <sup>1</sup> O)cobalt(II).                                                                                                                                                                                                                                                                                                                                                                                                                                                                                                                                              |
| <b>ACN</b>              | <p>1. Acetonitrileaqua(μ-3,5-dinitrobenzoato-1κ<sup>2</sup>O,O':2κ<sup>1</sup>O')bis(μ-3,5-dinitrobenzoato-1κ<sup>1</sup>O:2κ<sup>1</sup>O')-bis(μ-3,5-dinitrobenzoato-2κ<sup>1</sup>O:3κ<sup>1</sup>O')-acetonitrileaqua(μ-3,5-dinitrobenzoato-3κ<sup>2</sup>O,O':2κ<sup>1</sup>O')tricobalt(II)</p> <p>2. Diacetonitrile(μ-3,5-dinitrobenzoato-1κ<sup>2</sup>O,O':2κ<sup>1</sup>O')bis(μ-3,5-dinitrobenzoato-1κ<sup>1</sup>O:2κ<sup>1</sup>O')-bis(μ-3,5-dinitrobenzoato-2κ<sup>1</sup>O:3κ<sup>1</sup>O')-diacetonitrile (μ-3,5-dinitrobenzoato-3κ<sup>2</sup>O,O':2κ<sup>1</sup>O')tricobalt(II) acetonitrile trisolvate</p> |

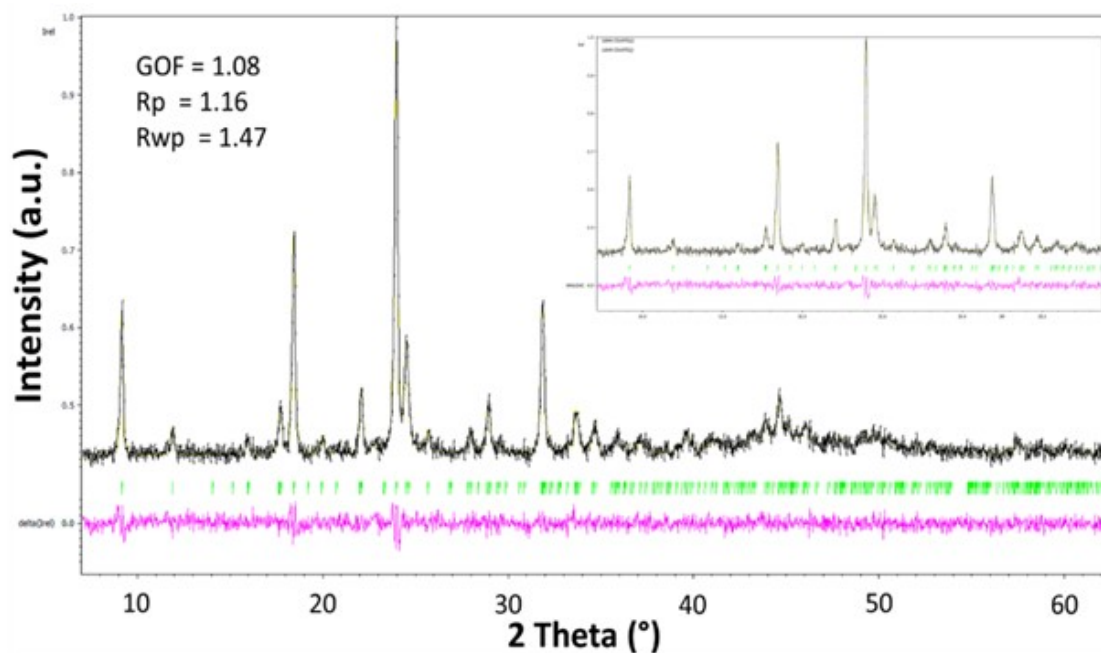

Figure S1. Graphical result of LeBail analysis of complex  $[\text{Co}(\text{DNB})_2]$ . Unit cell  $a = 9.6586$  (17) Å,  $b = 11.6717$  (14) Å,  $c = 6.3204$  (9) Å and  $\beta = 96.286^\circ$ , with most probably space group  $P2_1/m$ .

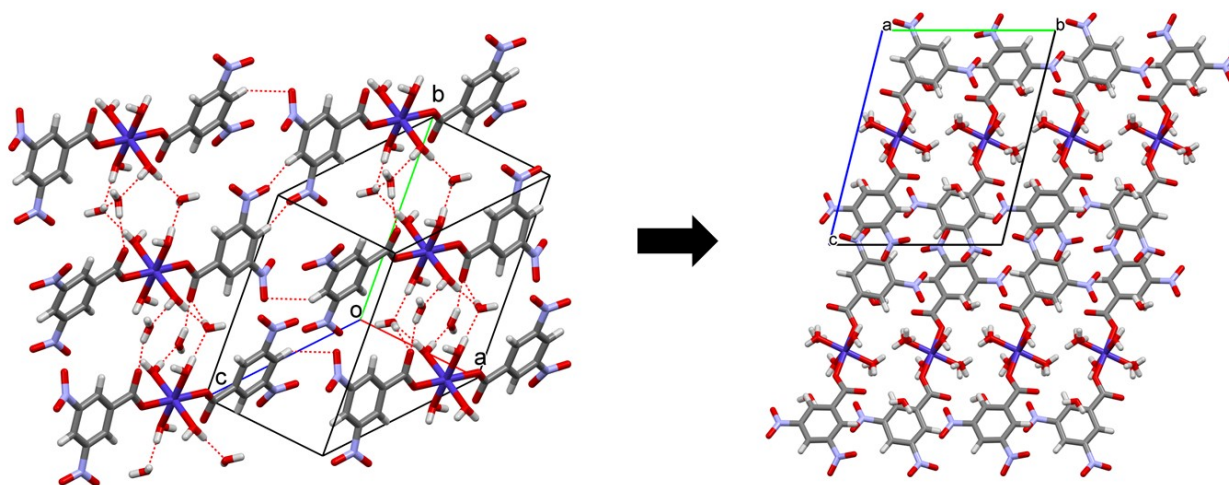

Figure S2. Packing of the complex  $[\text{Co}(\text{DNB})_2]$  recrystallized in  $\text{H}_2\text{O}$ .

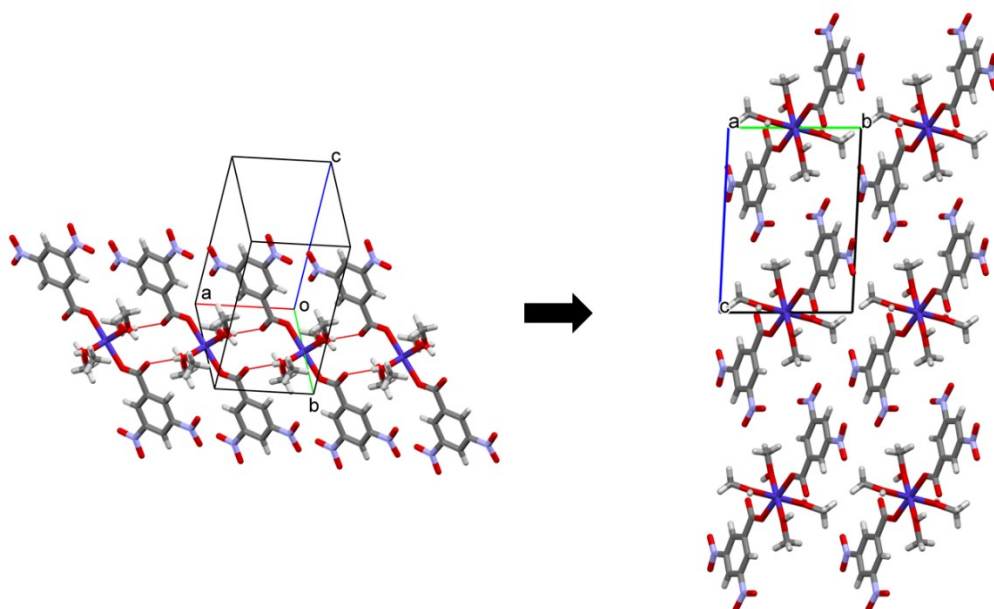

Figure S3. Packing of the complex [Co(DNB)<sub>2</sub>] recrystallized in MeOH.

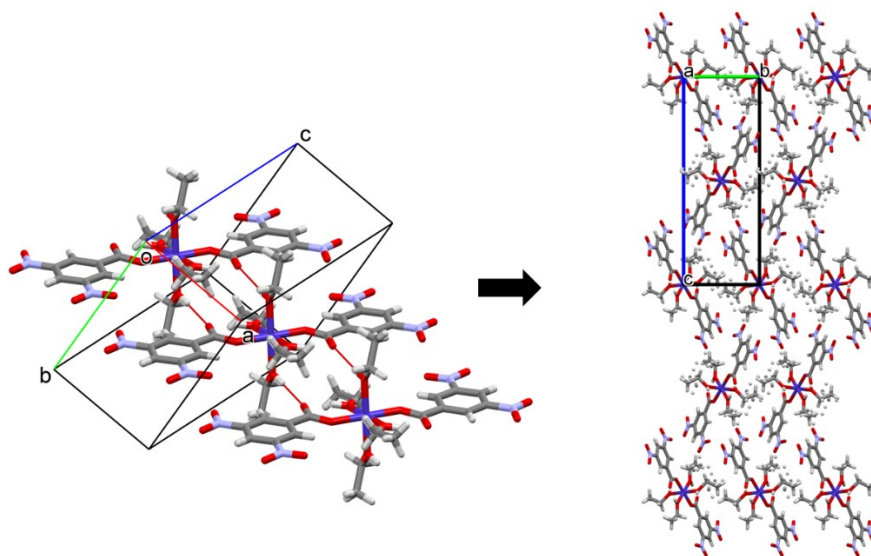

Figure S4. Packing of the complex [Co(DNB)<sub>2</sub>] recrystallized in EtOH.

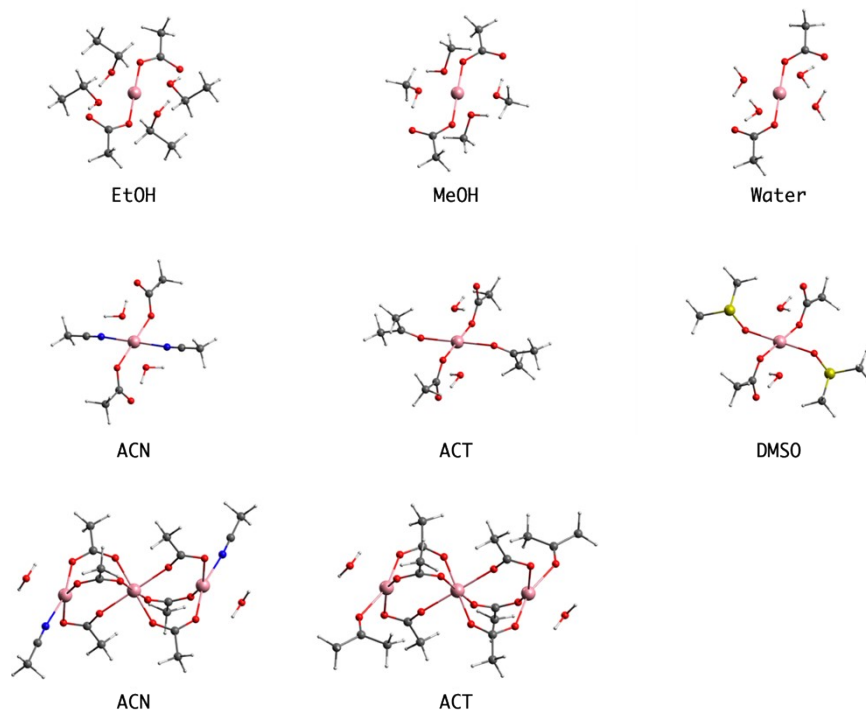

Figure S5. Optimized geometries of models of the  $[\text{Co}(\text{DBN})_2]$  complex recrystallized in the different solvents.

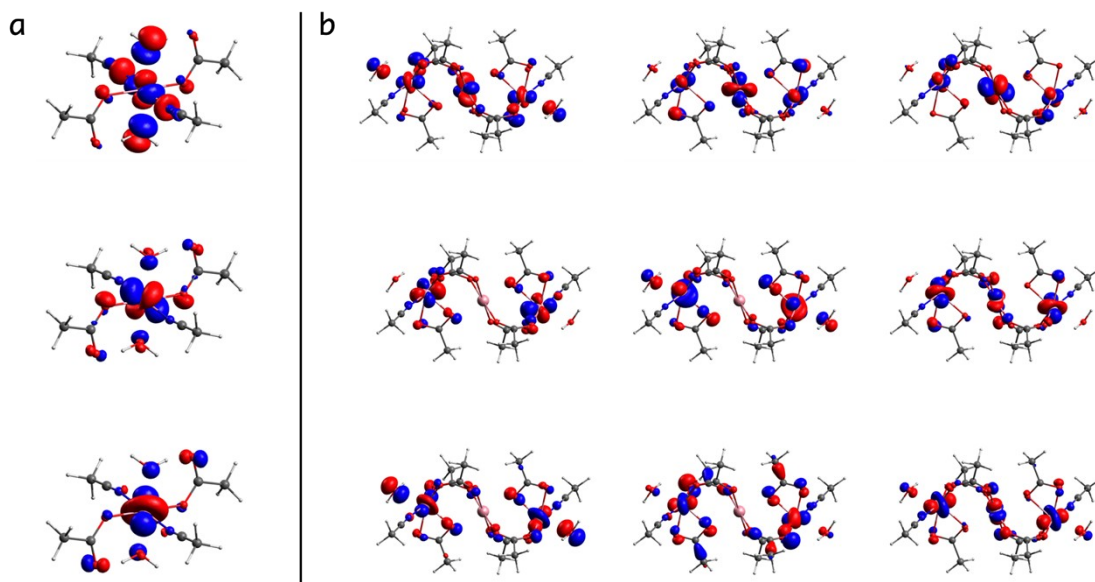

Figure S6. SOMOs of models of the  $[\text{Co}(\text{DBN})_2]$  complex recrystallized in ACN. a) Mononuclear with  $S=3/2$  ground state and b) Trinuclear with  $S=9/2$  ground state.

Table S4. Analysis of Potential Hydrogen Bonds for complex crystallized in H<sub>2</sub>O

=====  
 Analysis of Potential Hydrogen Bonds and Schemes with d(D...A) < R(D)+R(A)+0.50, d(H...A) < R(H)+R(A)-0.12 Ang., D-H...A > 100.0 Deg  
 =====

Note: - ARU codes in [ ] are with reference to the Coordinates printed above (Possibly transformed, when MOVE .NE. 1.555)  
 =====

| Nr | Typ   | Res   | Donor  | --- H...A | Acceptor [ ARU ] | D - H | H...A           | D...A | D - H...A | A..H..A* A'..H..A" | Sum (XY, YZ) | Sum (XZ) |
|----|-------|-------|--------|-----------|------------------|-------|-----------------|-------|-----------|--------------------|--------------|----------|
| 1  |       | 1 O3  | --H3A  | ..O10     | [ 1555.05]       | 0.82  | 1.88 2.6939(13) |       | 179       |                    |              |          |
| 2  |       | 1 O3  | --H3B  | ..07      | [ 2766.02]       | 0.85  | 1.92 2.7703(12) |       | 175       |                    |              |          |
| 3  |       | 1 O4  | --H4A  | ..07      | [ 1555.02]       | 0.82  | 1.92 2.7360(12) |       | 179       |                    |              |          |
| 4  | Intra | 1 O4  | --H4B  | ..O11     | [ ]              | 0.83  | 1.99 2.7535(13) |       | 153       |                    |              |          |
| 5  |       | 1 O5  | --H5A  | ..08      | [ 1555.03]       | 0.84  | 1.91 2.7552(12) |       | 176       |                    |              |          |
| 6  |       | 1 O5  | --H5B  | ..09      | [ 2676.04]       | 0.84  | 1.99 2.8201(13) |       | 173       |                    |              |          |
| 7  |       | 1 O6  | --H6A  | ..08      | [ 2676.03]       | 0.82  | 1.96 2.7760(12) |       | 169       |                    |              |          |
| 8  | Intra | 1 O6  | --H6B  | ..O21     | [ ]              | 0.83  | 1.91 2.6915(12) |       | 157       |                    |              |          |
| 9  |       | 2 O7  | --H7A  | ..04      | [ 2666.01]       | 0.80  | 2.58 3.1679(12) |       | 131       |                    |              |          |
| 10 |       | 2 O7  | --H7A  | ..05      | [ 2666.01]       | 0.80  | 2.21 2.9241(12) |       | 149'      | 75'                | 355          |          |
| 11 |       | 2 O7  | --H7B  | ..O11     | [ 2766.01]       | 0.82  | 2.06 2.8297(13) |       | 157       |                    |              |          |
| 12 |       | 3 O8  | --H8A  | ..09      | [ 1555.04]       | 0.82  | 2.07 2.8784(13) |       | 166       |                    |              |          |
| 13 |       | 3 O8  | --H8B  | ..03      | [ 1455.01]       | 0.81  | 2.20 2.9427(13) |       | 151       |                    |              |          |
| 14 |       | 3 O8  | --H8B  | ..06      | [ 1455.01]       | 0.81  | 2.50 3.0954(12) |       | 131'      | 75'                | 357          |          |
| 15 |       | 4 O9  | --H9A  | ..O21     | [ 1555.01]       | 0.81  | 1.93 2.7062(13) |       | 160       |                    |              |          |
| 16 |       | 4 O9  | --H9B  | ..O1AA    | [ 2677.01]       | 0.82  | 2.55 3.2506(12) |       | 144       |                    |              |          |
| 17 |       | 5 O10 | --H10A | ..O13     | [ 1556.01]       | 0.79  | 2.58 3.1001(13) |       | 124       |                    |              |          |
| 18 |       | 5 O10 | --H10A | ..O26     | [ 2776.01]       | 0.79  | 2.46 2.9235(14) |       | 119'      | 117'               | 360          |          |
| 19 |       | 5 O10 | --H10B | ..O11     | [ 2766.01]       | 0.79  | 2.04 2.7648(13) |       | 152       |                    |              |          |
| 20 |       | 1 C14 | --H14  | ..O25     | [ 2775.01]       | 0.95  | 2.45 3.3714(15) |       | 164       |                    |              |          |
| 21 |       | 1 C24 | --H24  | ..O14     | [ 1456.01]       | 0.95  | 2.54 3.3232(15) |       | 139       |                    |              |          |

Translation of ARU-Code to CIF and Equivalent Position Code

=====  
 [ 1456.] = [ 1\_456] = -1+x, y, 1+z  
 [ 1556.] = [ 1\_556] = x, y, 1+z  
 [ 2677.] = [ 2\_677] = 1-x, 2-y, 2-z  
 [ 2766.] = [ 2\_766] = 2-x, 1-y, 1-z  
 [ 2666.] = [ 2\_666] = 1-x, 1-y, 1-z  
 [ 2676.] = [ 2\_676] = 1-x, 2-y, 1-z  
 [ 2776.] = [ 2\_776] = 2-x, 2-y, 1-z  
 [ 2775.] = [ 2\_775] = 2-x, 2-y, -z  
 [ 1455.] = [ 1\_455] = -1+x, y, z

For C--H...Acceptor Interactions See: Th. Steiner, Cryst. Rev, (1996), 6, 1-57

"shelx " PLATON-H-BONDS Page 59



Table S5. Analysis of Potential Hydrogen Bonds for complex crystallized in MeOH

```

=====
Analysis of Potential Hydrogen Bonds and Schemes with d(D...A) < R(D)+R(A)+0.50, d(H...A) < R(H)+R(A)-0.12 Ang., D-H...A > 100.0 Deg
=====
Note: - ARU codes in [] are with reference to the Coordinates printed above (Possibly transformed, when MOVE .NE. 1.555)
=====

```

| Nr | Typ   | Res | Donor | ---     | H....Acceptor | [ ARU ]    | D - H   | H...A   | D...A      | D - H...A | A..H...A* A'..H...A" | Sum (XY, YZ) | Sum (XZ) |
|----|-------|-----|-------|---------|---------------|------------|---------|---------|------------|-----------|----------------------|--------------|----------|
| 1  |       | 1   | O(7)  | --H(7D) | ..O(2)        | [ 2665.01] | 0.77(3) | 1.90(3) | 2.663(2)   | 178(4)    |                      |              |          |
| 2  | Intra | 1   | O(8)  | --H(8D) | ..O(2)        | [ ]        | 0.80(3) | 1.89(2) | 2.6498(19) | 158(2)    |                      |              |          |

Translation of ARU-Code to CIF and Equivalent Position Code

```

=====
[ 2665.] = [ 2_665] =1-x,1-y,-z
=====

```

Table S6. Analysis of Potential Hydrogen Bonds for complex crystallized in EtOH

```

=====
Analysis of Potential Hydrogen Bonds and Schemes with d(D...A) < R(D)+R(A)+0.50, d(H...A) < R(H)+R(A)-0.12 Ang., D-H...A > 100.0 Deg
=====
Note: - ARU codes in [] are with reference to the Coordinates printed above (Possibly transformed, when MOVE .NE. 1.555)
=====

```

| Nr | Typ   | Res | Donor | ---  | H....Acceptor | [ ARU ]    | D - H   | H...A   | D...A    | D - H...A | A..H...A* A'..H...A" | Sum (XY, YZ) | Sum (XZ) |
|----|-------|-----|-------|------|---------------|------------|---------|---------|----------|-----------|----------------------|--------------|----------|
| 1  |       | 1   | O7    | --H7 | ..O2          | [ 1655.01] | 0.82(2) | 1.90(2) | 2.713(3) | 169(3)    |                      |              |          |
| 2  | Intra | 1   | O8    | --H8 | ..O2          | [ ]        | 0.81(3) | 1.85(3) | 2.632(3) | 162(3)    |                      |              |          |

Translation of ARU-Code to CIF and Equivalent Position Code

```

=====
[ 1655.] = [ 1_655] =1+x,y,z
=====

```

Table S7. Analysis of Potential Hydrogen Bonds for complex crystallized in DMSO

=====  
 Analysis of Potential Hydrogen Bonds and Schemes with  $d(D...A) < R(D)+R(A)+0.50$ ,  $d(H...A) < R(H)+R(A)-0.12$  Ang.,  $D-H...A > 100.0$  Deg  
 =====

Note: - ARU codes in [ ] are with reference to the Coordinates printed above (Possibly transformed, when MOVE .NE. 1.555)  
 =====

| Nr | Typ   | Res | Donor | --- H...Acceptor | [ ARU ] | D - H      | H...A | D...A | D - H...A  | A..H...A* A'..H...A" | Sum (XY, YZ) | Sum (XZ) |
|----|-------|-----|-------|------------------|---------|------------|-------|-------|------------|----------------------|--------------|----------|
| 1  | Intra | 1   | O(3)  | --H(3A)          | ..O(11) | [ 3676.01] | 0.83  | 1.84  | 2.6311(16) | 159                  |              |          |
| 2  |       | 1   | O(3)  | --H(3B)          | ..O(2)  | [ 1545.01] | 0.81  | 2.27  | 2.9455(15) | 141                  |              |          |
| 3  |       | 1   | O(3)  | --H(3B)          | ..O(1)  | [ 3666.01] | 0.81  | 2.58  | 3.2683(15) | 144'                 | 72'          | 357      |
| 4  |       | 1   | C(21) | --H(21C)         | ..O(15) | [ 4464.01] | 0.98  | 2.41  | 3.215(2)   | 139                  |              |          |
| 5  |       | 1   | C(22) | --H(22A)         | ..O(14) | [ 2566.01] | 0.98  | 2.47  | 3.290(2)   | 141                  |              |          |
| 6  |       | 1   | C(22) | --H(22B)         | ..O(15) | [ 2556.01] | 0.98  | 2.52  | 3.208(2)   | 127                  |              |          |
| 7  |       | 1   | C(22) | --H(22C)         | ..O(3)  | [ 1565.01] | 0.98  | 2.49  | 3.318(2)   | 142                  |              |          |

Translation of ARU-Code to CIF and Equivalent Position Code  
 =====

[ 3676.] = [ 3\_676] =1-x,2-y,1-z  
 [ 1565.] = [ 1\_565] =x,1+y,z  
 [ 3666.] = [ 3\_666] =1-x,1-y,1-z  
 [ 1545.] = [ 1\_545] =x,-1+y,z  
 [ 2556.] = [ 2\_556] =1/2-x,1/2+y,3/2-z  
 [ 4464.] = [ 4\_575] =-1/2+x,3/2-y,-1/2+z  
 [ 2566.] = [ 2\_566] =1/2-x,3/2+y,3/2-z

For C--H...Acceptor Interactions See: Th. Steiner, Cryst. Rev, (1996), 6, 1-57

Table S8. Analysis of Potential Hydrogen Bonds for complex crystallized in Acetone

=====  
 Analysis of Potential Hydrogen Bonds and Schemes with  $d(D...A) < R(D)+R(A)+0.50$ ,  $d(H...A) < R(H)+R(A)-0.12$  Ang.,  $D-H...A > 100.0$  Deg  
 =====

Note: - ARU codes in [ ] are with reference to the Coordinates printed above (Possibly transformed, when MOVE .NE. 1.555)  
 =====

| Nr | Typ   | Res | Donor | --- H...Acceptor | [ ARU ] | D - H      | H...A   | D...A   | D - H...A | A..H...A* A'..H...A" | Sum(XY,YZ) | Sum(XZ) |
|----|-------|-----|-------|------------------|---------|------------|---------|---------|-----------|----------------------|------------|---------|
| 1  |       | 1   | O12   | --H12A           | ..O17   | [ 2666.03] | 0.87(5) | 1.85(5) | 2.710(3)  | 168(6)               |            |         |
| 2  |       | 1   | O12   | --H12B           | ..O18   | [ 2666.04] | 0.82(6) | 1.92(6) | 2.702(4)  | 159(5)               |            |         |
| 3  |       | 1   | O13   | --H13A           | ..O16   | [ 2566.02] | 0.80(5) | 1.91(5) | 2.709(4)  | 170(4)               |            |         |
| 4  |       | 1   | O13   | --H13B           | ..O19   | [ 1555.05] | 0.85(5) | 1.93(6) | 2.767(3)  | 169(5)               |            |         |
| 5  | Intra | 1   | C4    | --H4             | ..O11   | [ 2666.01] | 0.95    | 2.40    | 3.306(4)  | 159                  |            |         |
| 6  |       | 1   | C7    | --H7             | ..O1    | [ 2657.01] | 0.95    | 2.55    | 3.446(4)  | 158                  |            |         |
| 7  |       | 1   | C11   | --H11            | ..O16   | [ 1555.02] | 0.95    | 2.51    | 3.423(4)  | 162                  |            |         |
| 8  |       | 1   | C16   | --H16            | ..O5    | [ 1554.01] | 0.95    | 2.56    | 3.502(4)  | 174                  |            |         |
| 9  |       | 2   | C30   | --H30A           | ..O4    | [ 2566.01] | 0.98    | 2.51    | 3.386(5)  | 148                  |            |         |
| 10 |       | 2   | C30   | --H30C           | ..O7    | [ 1555.01] | 0.98    | 2.50    | 3.460(5)  | 165                  |            |         |
| 11 |       | 3   | C33   | --H33A           | ..O19   | [ 1655.05] | 0.98    | 2.56    | 3.460(5)  | 153                  |            |         |
| 12 |       | 4   | C36   | --H36B           | ..O6    | [ 2656.01] | 0.98    | 2.59    | 3.338(7)  | 133                  |            |         |

Translation of ARU-Code to CIF and Equivalent Position Code  
 =====

[ 2666.] = [ 2\_666] =1-x,1-y,1-z  
 [ 2566.] = [ 2\_566] =-x,1-y,1-z  
 [ 2657.] = [ 2\_657] =1-x,-y,2-z  
 [ 2656.] = [ 2\_656] =1-x,-y,1-z  
 [ 1554.] = [ 1\_554] =x,y,-1+z  
 [ 1655.] = [ 1\_655] =1+x,y,z

For C--H...Acceptor Interactions See: Th. Steiner, Cryst. Rev, (1996), 6, 1-57
